# Supplementary material for: Trends in Simple and Complex Appendicitis in Children and the Potential Correlation to Common Viral Pathogens—A Retrospective Cohort Study between 2010 and 2019 in The Netherlands
Source: MDPI journal article supplement (doi:10.3390/children10121912), 2023-12-11
Supplement: s1 [file s1]

**Table S1.** Articles addressing seasonal variation in children with appendicitis.

| <b>Author (year)</b>         | <b>Country</b> | <b>Number patients</b> | <b>Age (years)</b> | <b>Season</b>          | <b>Finding</b> |
|------------------------------|----------------|------------------------|--------------------|------------------------|----------------|
| <b>Deng (2010) [17]</b>      | USA            | 31.457                 | < 18               | Spring (Mar-May)       | 24.2%          |
|                              |                |                        |                    | Summer (Jun-Aug)       | 25.5%          |
|                              |                |                        |                    | Fall (Sep-Nov)         | 25.8%          |
|                              |                |                        |                    | Winter (Dec-Feb)       | 24.6%          |
| <b>Zhang (2018) [16]</b>     | China          | 3.436                  | < 18               | Spring                 | Peak           |
|                              |                |                        |                    | Summer                 | Peak           |
|                              |                |                        |                    | Autumn                 | Peak           |
|                              |                |                        |                    | Winter                 | Peak           |
| <b>Rautava (2018) [15]</b>   | Finland        | 8494                   | < 16               | Spring (Mar-May)       | 24.9%          |
|                              |                |                        |                    | Summer (Jun-Aug)       | 27.2%          |
|                              |                |                        |                    | Autumn (Sep-Nov)       | 24.1%          |
|                              |                |                        |                    | Winter (Dec-Feb)       | 23.8%          |
| <b>Jangra (2013) [18]</b>    | India          | 395                    | -                  | Rainy season (Jul-Sep) | Peaks          |
| <b>Hsu (2019) [19]</b>       | Taiwan         | 171                    | < 18               | Summer (May-Oct)       | 59.1%          |
|                              |                |                        |                    | Non-Summer (Nov-Apr)   | 40.9%          |
| <b>Gallerani (2006) [20]</b> | Italy          | 654                    | $\leq 19$          | Spring                 | 23.5%          |
|                              |                |                        |                    | Summer                 | 21.7%          |
|                              |                |                        |                    | Autumn                 | 25.5%          |
|                              |                |                        |                    | Winter                 | 29.2%          |
